1 **The symbiotic complex of *Dendroctonus simplex*:**  
2 **implications in the beetle attack and its life cycle**

3

4

5 Audrey-Anne Durand, Philippe Constant, Eric Déziel and Claude Guertin

6

7 INRS-Institut Armand Frappier, 531 Boul. Des Prairies, Laval (Québec), Canada, H7V 1B7

8

9

10 \*Corresponding Author: Claude Guertin, 531 Boul. Des Prairies, Laval, Quebec, Canada, H7V

11 1B7, Phone: (450) 687-5010 ext. 4117, [Claude.Guertin@iaf.inrs.ca](mailto:Claude.Guertin@iaf.inrs.ca)

12

## 13 **Abstract**

14           The eastern larch beetle (*Dendroctonus simplex* Le Conte) is recognized as a serious  
15 destructive forest pest in the upper part of North America. Under epidemic conditions, this  
16 beetle can attack healthy trees, causing severe damages to larch stands. *Dendroctonus*  
17 species are considered as holobionts, as they engage in multipartite interactions with  
18 microorganisms, such as bacteria, filamentous fungi, and yeasts, which are implicated in  
19 physiological processes of the insect, such as nutrition. They also play a key role in the  
20 beetle's attack, as they are responsible for the detoxification of the subcortical environment  
21 and weaken the tree's defense mechanisms. The eastern larch beetle is associated with  
22 bacteria and fungi, but their implication in the success of the beetle remains unknown. Here,  
23 we investigated the bacterial and fungal microbiota of this beetle pest throughout its  
24 ontogeny (pioneer adults, larvae and pupae) by high-throughput sequencing. A successional  
25 microbial assemblage was identified throughout the beetle developmental stages, reflecting  
26 the beetle's requirements. These results indicate that a symbiotic association between the  
27 eastern larch beetle and some of these microorganisms takes place and that this *D. simplex*  
28 symbiotic complex is helping the insect to colonize its host tree and survive the conditions  
29 encountered.

30

31

32 **Keywords :** *Dendroctonus*, Developmental stages, Microbiota, Microbial communities, High  
33 throughput sequencing

## 34 Introduction

35           The eastern larch beetle, *Dendroctonus simplex* LeConte (Coleoptera: Scolytinae), is a  
36 phloem-feeding insect that attacks tamarack trees, *Larix laricina* (Du Roi) K. Koch (Wood,  
37 2007). During the dispersal period, pioneer beetles attack trees and build galleries in the  
38 phloem layer. Following the reproduction and eggs hatching, larvae also excavate galleries  
39 and eat phloem throughout their development. The last larval instar digs a pupal chamber,  
40 stops feeding and empties his digestive tract in preparation for transformation in pupae,  
41 representing an inactive stage. Pupae will then transform into adults, overwintering until  
42 the next dispersal period (Langor & Raske, 1987a; Langor & Raske, 1987b). This beetle is  
43 considered a secondary pest because it usually attacks weakened or freshly dead trees.  
44 However, under epidemic conditions, it can attack healthy trees, causing severe damage to  
45 larch stands (Langor & Raske, 1987a; Langor & Raske, 1989b). The widespread attacks of the  
46 eastern larch beetle observed in the past suggest that this pest should no longer be  
47 considered secondary (Langor & Raske, 1989a). More recently, extensive attacks have been  
48 observed in Quebec (Canada), causing the death of thousands of larch trees across the  
49 province.

50           Bark beetles engage in a multitude of interactions with various microorganisms to  
51 form a holobiont (Margulis & Fester, 1991; Six, 2013). *Dendroctonus* species are commonly  
52 associated with bacteria, filamentous fungi, and yeasts. This assemblage of microorganisms,  
53 also called microbiota, is implicated in various physiological processes of the insect,  
54 colonization of the host tree, and protection from antagonistic organisms (Popa *et al.*, 2012;  
55 Hofstetter *et al.*, 2015). Accordingly, microorganisms included in the *Dendroctonus*  
56 microbiota may act as key factors in their success.

57            *Dendroctonus* species are associated with a variety of bacterial genera. Some of  
58 these bacteria are implicated in the beetle nutrition, supplementing the nutrient-poor  
59 phloem diet with amino acids, nitrogen and vitamins (Bridges, 1981; Morales-Jimenez *et al.*,  
60 2009; Morales-Jimenez *et al.*, 2013). Some are also able to break down cellulose, helping  
61 the assimilation by the insect (Morales-Jimenez *et al.*, 2012). Additionally, some bacteria are  
62 implicated in detoxification processes, such as terpenoid degradation (Adams *et al.*, 2013).  
63 Some bacteria also produce antifungal compounds that protect the insect against  
64 antagonistic fungi (Scott *et al.*, 2008). On the other hand, associated filamentous fungi are  
65 also implicated in beetle nutrition, supplementing their diet with sterols (Bentz & Six, 2006).  
66 Some fungi can weaken the tree defense system, leading the insect to a successful attack  
67 (Paine *et al.*, 1997). Yeasts also play a significant role in beetle success, as they are reported  
68 to be implicated in nutrition, detoxification of plant defense compounds and protection  
69 from antagonistic microorganisms (Davis, 2014). Additionally, associated yeasts are  
70 referred as mediators of the beetle-microorganisms interactions (Davis *et al.*, 2011; Davis,  
71 2014; Hofstetter *et al.*, 2015). It appears that several functions are redundant among  
72 microorganisms forming the microbiota.

73            In the present study, the bacterial and fungal microbiota of the eastern larch beetle  
74 was identified at various beetle developmental stages (pioneers adult, larvae, and pupae) by  
75 high-throughput sequencing of the 16S and 18S rRNA genes. Since they are distinct, as we  
76 have previously demonstrated, both the ecto- and the endomicrobiota of the insect were  
77 investigated (Durand *et al.*, 2015). The aim of this study was to understand the crucial role  
78 played by the microbiota of *D. simplex* in the colonization success and to follow the changes  
79 that may occur in the microbial populations throughout its life cycle. We hypothesized that  
80 a core microbiota should be associated with *D. simplex* and that the proportion of these

81 microorganisms should vary in function of beetle development. Moreover, pioneer beetles  
82 should carry microorganisms playing a key role in the beetle attack. These results will help  
83 us understand the eastern larch beetle attack and colonization process.

84

85

## 86 **Materials and Methods**

### 87 **Site location, beetles processing, and samples preparation**

88 Insects were collected from a Quebec Province larch plantation located near Saint-  
89 Claude (Quebec, Canada; Lat. 45.6809, Long. -71.9969) with the permission of the *Ministère*  
90 *des Forêts, de la Faune et des Parcs* authority. Log sections of randomly selected larch trees  
91 showing apparent signs of attacks by *D. simplex* were transported to the laboratory where  
92 they were stored at room temperature in plexiglass cages (30 cm x 30 cm x 88 cm). Beetle  
93 development monitoring and retrieval were achieved as described previously (Durand *et al.*,  
94 2017). For each developmental stage, microorganisms associated with the ecto- and  
95 endomicrobiota were separated and recovered as previously described (Durand *et al.*, 2015).  
96 For the ectomicrobiota of each development stage, 50 insects per replicate were randomly  
97 selected, and pooled in a 15 ml polypropylene tube to recover sufficient bacterial genomic  
98 DNA from the surface of the cuticle. Then, each sample underwent five successive washes  
99 with 5 ml phosphate-buffered saline (PBS) containing 0.1 % Triton X-100, with 1 min  
100 agitation (Genie 2 Vortex, Fisher, Ottawa, ON, Canada). The solution was filtered through a  
101 0.22 µm nitrocellulose filter (EMD Millipore, Billerica, MA, USA) to recover the biomass.  
102 Each filter was placed in a Lysing matrix A tube (MP Biomedicals, Solon, OH, USA) for DNA

103 extraction. Ten previously washed beetles were randomly selected for each replicate to  
104 retrieve the endomicrobiota. Their external surface was sterilized with three serial washing  
105 in 70% EtOH, followed by one wash with sterile ultrapure water, as this protocol as shown a  
106 complete separation of both microbiota before (Durand *et al.*, 2015). The insects were then  
107 crushed into PBS and placed in a 2 ml screw cap tube containing 200 mg of 0.1 mm glass  
108 beads (BioSpecs, Bartlesville, OK, USA) for DNA extraction. Three biological replicates were  
109 achieved for each developmental stage and microbiota, representing a total of 18 samples.

110

## 111 **DNA Extraction and PCR amplification**

112 Total DNA was extracted following the method previously described (Durand *et al.*,  
113 2015). A negative control using all the extraction solutions but no insect was achieved. DNA  
114 concentration was estimated using the Quant-iT™ PicoGreen® dsDNA Assay Kit (Invitrogen,  
115 Life Technologies, Burlington, ON, Canada) following the manufacturer instruction. The  
116 integrity of the genomic DNA was confirmed on a 1% agarose gel stained with ethidium  
117 bromide and visualized under UV light.

118 PCR amplification was achieved to confirm the presence of microbial DNA in each  
119 sample. For the bacteria, universal primers 27F (5' AGA GTT TGA TCC TGG CTA G 3') and  
120 1492R (5' GGT TAC CTT GTT ACG ACT T 3') were used to amplify the 16S rRNA gene (Kwong  
121 & Moran, 2013). For the fungi, universal primer NSA3 (5' AAA CTC TGT CGT GCT GGG GAT A  
122 3') and NLC2 (5' GAG CTG CAT TCC CAA ACA ACT C 3') were used to amplified the SSU, ITS,  
123 and LSU regions of the rRNA genes (Martin & Rygiewicz, 2005). Each 50 µl PCR reaction  
124 contained 25 mM MgCl<sub>2</sub>, 10 µg BSA, 10 mM dNTPs, 10 mM of each primer, 5 U Taq DNA  
125 polymerase and ThermoPol® buffer (New England Biolabs, Whitby, ON, Canada). For the

126 bacteria, following the initial denaturation step of 5 min at 94°C, 30 amplification cycles  
127 were performed (94°C for 30 s, 55°C for 30 s, 72°C for 1 min and 30 s) followed by a final  
128 extension step at 72°C for 10 min. For the fungi, following the initial denaturation step of 5  
129 min at 94°C, 30 amplification cycles were performed (94°C for 30 s, 67°C for 30 s, 72°C for 1  
130 min) followed by a final extension step at 72°C for 10 min. Amplification was confirmed by  
131 electrophoresis of the PCR products on a 1.5% agarose gel stained with ethidium bromide  
132 and visualized under UV light. Bacterial and fungal DNA was present in each sample, except  
133 for the negative control.

134

## 135 **Pyrosequencing of microbial DNA**

136 Genomic DNA from each sample was sent to Research and Testing Laboratory  
137 (Lubbock, TX, USA) for sequencing. The bacterial 16S rRNA gene was amplified using the  
138 universal primers 28F (5' GAG TTT GAT CNT GGC TAC G 3') and 519R (5' GTN TTA CNG CGG  
139 CKG CTG 3') targeting the V1-V3 hypervariable regions. Roche 454 FLX-Titanium chemistry  
140 was used to sequence the amplicons. Elongation was performed from the forward primer.  
141 Raw data are available on NCBI under BioProject number PRJNA401528.

142 Sequences related to fungal microbiota associated with the eastern larch beetle  
143 (BioProject PRJNA354793) presented in our previous study (Durand *et al.*, 2017) were also  
144 used in this study. The fungal 18S rRNA gene was amplified using the universal primers  
145 SSUForward (5' TGG AGG GCA AGT CTG GTG 3') and funTitSsuRev (5' TCG GCA TAG TTT ATG  
146 GTT AAG 3'). Roche 454 FLX-Titanium chemistry was also used to sequence the amplicons.  
147 Elongation was performed from the forward primer as well.

148

## 149 Sequences processing pipeline

150 The post-sequencing processing was completed using the open-source program  
151 mothur v.1.33.0 software (<http://www.mothur.org>) (Schloss *et al.*, 2009). For the sequences  
152 associated with the bacterial microbiota, the pipeline described by Comeau and  
153 collaborators was followed (Comeau *et al.*, 2012). Raw 454 reads were first processed to  
154 remove low-quality reads, such as (i) the presence of one or more uncertain bases (N), (ii)  
155 sequences shorter than 150 nt (nucleotides), (iii) unusually long reads that extended more  
156 than 100 nt over the amplicon size, (iv) reads that have long homopolymer sequences (more  
157 than 8), and (v) reads with incorrect forward primer sequences. Regions corresponding to  
158 the forward primer were kept to facilitate the alignment of the sequences during  
159 subsequent analyses. Contaminant sequences, such as chloroplast and mitochondria, were  
160 removed from the dataset. Additionally, chimeras were removed with UCHIME (Edgar *et al.*,  
161 2011), as implemented in mothur. The remaining filtered sequences were aligned by  
162 domain against the SILVA reference alignment release 119 (Quast *et al.*, 2013) using the  
163 ksize=9 parameter in mothur. Reads were also trimmed of all bases beyond the reverse  
164 primer with BioEdit 7.2.5 (<http://www.mbio.ncsu.edu/bioedit/bioedit.html>). Singletons  
165 were finally removed after clustering into draft Operational Taxonomic Units (OTUs) to  
166 obtain the final quality reads. Libraries were normalized to the sequencing effort of the  
167 smallest 16S rRNA gene library (1744 sequences/samples) to avoid biases in comparative  
168 analyses introduced by the sampling depth. The last aligned reads were clustered into OTUs  
169 at  $\geq 97\%$  identity threshold using the furthest neighboring cluster in mothur (Schmitt *et al.*,  
170 2012). Representative sequences of each OTU were taxonomically identified using the  
171 Ribosomal Database Project (RDP) classifier (Wang *et al.*, 2007).



172 For the sequences associated with the fungal microbiota, raw sequences processing,  
173 clusterization, taxonomical identification and equalization of the library was done as  
174 described before (Durand *et al.*, 2017).

175

## 176 **Data analysis**

177 Rarefaction curves were generated within the mothur software to evaluate the  
178 sufficiency of the sequencing effort (data not shown). Shannon diversity index was also  
179 calculated with mothur, and ANOVA was performed with JMP Pro 12 (SAS Institute Inc.,  
180 Cary, NC, USA) on obtained values. A PERMANOVA analysis on the generated bacterial and  
181 fungal OTUs was performed with the R software 3.1.3 (<http://www.r-project.org>) using the  
182 package “vegan”. A Euclidean distance matrix was used to generate a UPGMA  
183 agglomerative clustering according to the identified OTUs and their abundance with R using  
184 the package “hclust”. Significant nodes were identified by performing 999 permutations of  
185 the dataset. The heatmap representing OTUs abundance was generated with the package  
186 “gplots” and “RColorBrewer”.

187

188

## 189 **Results**

### 190 **Diversity of the associated microbial community across *D. simplex*** 191 **developmental stages**

192 The microbial diversity associated with the eastern larch beetle developmental  
193 stages were compared using 18 samples that were sequenced to characterize the bacterial

194 and fungal microbiota. For the bacteria, a total of 31,392 high-quality-filtered sequences  
195 were recovered after quality control and equalization. The average read length was 442 bp.  
196 Clusterization at a 97% pairwise-identity threshold generated 4009 OTUs. The Shannon  
197 diversity index was calculated for all samples, and significant differences (ANOVA test;  $F =$   
198  $9.52$ ;  $p < 0,0007$ ) are observed throughout the beetle developmental stages (Table 1). The  
199 endomicrobiota of the larvae exhibited the lowest diversity, followed by the ectomicrobiota  
200 of all developmental stages. The highest diversity was associated with the pupae  
201 endomicrobiota. Overall, the Shannon diversity index is higher for the endomicrobiota than  
202 the ectomicrobiota, except for the larvae samples.

203 For the fungi, a total of 44,377 high-quality-filtered sequences were obtained after  
204 quality control and equalization, with an average read length of 447 bp. Clusterization at a  
205 97% pairwise-identity threshold generated 1623 OTUs. No significant difference in  
206 Shannon's diversity index is observed between fungal community structures of each sample  
207 (Table 1). After analysis, a suitable number of sequences were obtained to characterize the  
208 eastern larch beetle bacterial and fungal microbiota.

209

## 210 **Variation and taxonomical composition of the microbial** 211 **communities across the eastern larch beetle developmental stages**

212 Bacterial community differences within the beetle ontogeny are observed on the  
213 similarity dendrogram (Fig. 1). Samples associated with the endomicrobiota of the adults  
214 and pupae constitute a cluster significantly different from other samples. Additionally, the  
215 ectomicrobiota of the adults is creating a distinct cluster from the other ectomicrobiota  
216 samples. Accordingly, the ectomicrobiota of the pupae and larvae are grouped along with

217 the endomicrobiota of the larvae, showing significant differences in the bacterial  
218 community for the interior of the insect at the larval stage.

219 To identify the microbial composition of these communities, all identified bacterial  
220 OTUs were taxonomically assigned using the RDP classifier. Almost all bacterial OTUs were  
221 Proteobacteria, but some Firmicutes and Acidobacteria were also found. Among the  
222 Proteobacteria, Alphaproteobacteria and Gammaproteobacteria were represented. Figure 1  
223 shows the taxonomical identification for the abundant bacterial OTUs ( $\geq 1\%$  of the relative  
224 abundance per sample). For the ectomicrobiota, a few bacterial genera are abundant at all  
225 developmental stages, such as *Erwinia*, *Pseudomonas*, *Serratia*, *Yersinia* and unclassified  
226 OTUs belonging to the Enterobacteriaceae family. Altogether, these OTUs represent 60% of  
227 the total abundance in adults, and 98% and 90% for the larvae and pupae respectively.  
228 Additionally, unclassified OTUs belonging to the Gammaproteobacteria class were also  
229 identified in samples associated with the adults and pupae, with relative abundance up to  
230 8%. The ectomicrobiota of the adults, which exhibited the highest specific richness of all  
231 developmental stages, included other lower abundance distinct OTUs: *Pseudoxanthomonas*  
232 and *Acidobacteria* Gp1, Alphaproteobacteria such as *Sphingomonas*, unclassified  
233 Beijerinckiaceae, Acetobacteraceae, and Rhizobiales. These OTUs are explaining the  
234 separate cluster set by adult ectomicrobiota over other samples.

235 Some of the bacteria found in the ectomicrobiota of the larvae were also associated  
236 with their endomicrobiota, such as *Erwinia*, *Serratia*, and *Yersinia*, representing 82% of the  
237 relative abundance. The *Erwinia* genus was also identified in the endomicrobiota of the  
238 adults, but in lower abundance (6% of the samples abundance). Additionally, OTUs related  
239 to the *Lactobacillus* genus were also identified in these samples with 4% of the total  
240 abundance. Several unclassified OTUs linked to Enterobacteriaceae and

241 Gammaproteobacteria were documented in samples associated with the endomicrobiota of  
242 the adults and pupae, representing, respectively, 81% and 84% of relative abundance. Some  
243 of these OTUs were also represented in the endomicrobiota of the larvae, but in lower  
244 abundance (15%). Finally, other non-abundant OTUs were also identified throughout the  
245 beetle developmental stages.

246 The similarity dendrogram for fungal communities (Fig. 2) shows different grouping  
247 patterns than for the bacterial communities. Indeed, the pupae samples (ecto- and  
248 endomicrobiota) are arranged in a cluster significantly different from the other samples.  
249 Additionally, samples associated with the ectomicrobiota of the adults and larvae constitute  
250 a cluster significantly distinct from those of their endomicrobiota.

251 All fungal OTUs were taxonomically identified by BLASTN against the NCBI database.  
252 All OTUs belong to the Ascomycota phylum. Among them, yeasts, all from the  
253 Saccharomycetes class, and filamentous fungi were identified. Figure 2 shows the  
254 taxonomical identification for the abundant fungal OTUs. Yeasts were predominant in  
255 samples associated with the adults and larvae, whereas filamentous fungi were mainly  
256 related to pupal samples, both for the ectomicrobiota and the endomicrobiota. *Candida* was  
257 the most abundant genus found associated with the adults and larvae ectomicrobiota (41%  
258 and 45% respectively), followed by *Wickerhamomyces* (13% and 19%). Others genera were  
259 also found, such as *Kuraishia*, *Ogataea*, *Peterozyma*, *Saccharomycopsis*, and *Yamadazyma*,  
260 with abundances ranging from 2% to 7%. The ectomicrobiota of pupae included only two  
261 abundant yeasts, *Candida* (7%) and *Yamadazyma* (14%), and two abundant filamentous  
262 fungi belonging to the Ophiostomatoid group, *Ceratocystiposis* (11%) and *Ophiostoma* (41%).  
263 Only *Ophiostoma* was associated in abundance with the adult ectomicrobiota samples.

264 Yeasts belonging to the *Candida* genus were also prevalent in the endomicrobiota at  
265 all developmental stages, with relative abundances ranging from 17% to 39%. Additionally,  
266 the *Yamadazyma* genus was also identified in samples from the adults and pupae (24% and  
267 26%, respectively). The other yeasts genera identified in the ectomicrobiota of the adults  
268 and larvae were also present in their endomicrobiota (1% to 9%). Two main filamentous  
269 fungi identified in the ectomicrobiota of the pupae, *Ceratocystiopsis* and *Ophiostoma*, were  
270 also identified in abundance in their endomicrobiota samples, with, respectively, 14% and  
271 19%. These filamentous fungi were also discovered in the endomicrobiota of the adults, but  
272 with lower abundances. As the adult's samples, few filamentous fungi were associated with  
273 the larvae, identified as *Exophila* (2%) and *Penicillium* (3%).

274 A PERMANOVA analysis was performed to explain if the variability was triggered by  
275 both the developmental stages and the microbiota location. For bacteria and fungi, the  
276 developmental stage explained a higher percentage of the variation (43% ( $p < 0.001$ ) for  
277 bacteria and 59% ( $p < 0.001$ ) for the fungi) than the microflora (14% ( $p < 0.001$ ) for bacteria  
278 and 9% ( $p < 0.006$ ) for the fungi).

279

280

## 281 Discussion

282 Bark beetles form associations with bacteria, filamentous fungi, and yeasts. These  
283 microorganisms play a major role in the beetle development and help the insect colonize  
284 the subcortical environment of the host tree (Six, 2013; Hofstetter *et al.*, 2015). They can be  
285 acquired either from the environment or directly from their parents by vertical transmission  
286 (Gibson & Hunter, 2010). To better understand the symbiotic relationship between a beetle

287 and its associated microorganisms, it is important to acquire a comprehensive portrait of  
288 the microbiota associated with the insect. Accordingly, the beetle microbiota, or at least the  
289 relative abundance of its various members, should change over the ontogeny of the insect  
290 in function of beetle requirements, resulting in a successional microbial assemblage. In this  
291 context, we characterized the microbiota associated with the developmental stages of the  
292 eastern larch beetle by high throughput sequencing to observe the progression of the  
293 microbiota over time. Because the surface and interior of the insect represent two distinct  
294 microbial communities, we investigated both populations separately.

295 As expected, both similarity dendrograms and taxonomical identifications revealed a  
296 succession of the abundant microorganisms associated with the eastern larch beetle  
297 throughout its ontogeny. Accordingly, the developmental stages explain a high proportion  
298 of the observed variations, as the PERMANOVA analyses show. These differences are  
299 probably related to the beetle requirements over the developmental process. Figure 3  
300 shows the proposed succession of abundant microorganisms and their possible functions  
301 according to the developmental stages and the microbiota of *D. simplex*. Non-abundant  
302 OTUs were still present in the samples, but not represented in the schema. This diagram is  
303 based on the sequencing results obtained and existing literature on beetle-associated  
304 microorganisms. Attack of tree and development of the eastern larch beetle start with a  
305 dispersion period. After the selection of a suitable host, pioneer beetles bore holes in the  
306 tree trunk and build-up galleries in the phloem layer (Langor & Raske, 1987a). To  
307 successfully attack and colonize the subcortical environment of the host tree, the insects  
308 need to overcome the tree defense system, for instance by clogging resin ducts and  
309 degrading terpenoid compounds (Paine *et al.*, 1997; Adams *et al.*, 2011). The microbiota is  
310 essential in these defensive actions (Six & Wingfield, 2011; Six, 2013). Accordingly, pioneer

311 beetles need to carry, mainly under their elytra, their associated microorganisms playing a  
312 key role in the protection from tree defense mechanisms (Durand *et al.*, 2015).  
313 Ophiostomatoid fungi have been frequently reported for their ability to colonize the resin  
314 ducts of conifer trees, enabling the insect to settle in the phloem without being trapped in  
315 the resin (Paine *et al.*, 1997; Lieutier *et al.*, 2009; Six & Wingfield, 2011). Indeed, the  
316 *Ophiostoma* genus was the only filamentous fungi identified in abundance (3%) in the  
317 ectomicrobiota of the adults. The beetle at this stage would transport and promote this  
318 filamentous fungus on its exoskeleton to weaken the tree defense system and thus benefit  
319 from it by successfully colonizing the host tree. Additionally, *Pseudomonas* and *Serratia*,  
320 which were reported to play a role in the degradation of terpenoid compounds in other  
321 *Dendroctonus* species, were identified in high proportion in the ectomicrobiota of *D. simplex*  
322 adults (Morales-Jimenez *et al.*, 2012; Adams *et al.*, 2013; Boone *et al.*, 2013). Yeasts, such as  
323 *Ogataea pini*, also abundant in the ectomicrobiota of adults, are able to tolerate and grow  
324 in the presence of some terpenoid compounds, but no direct evidence of degradation has  
325 been demonstrated (Davis & Hofstetter, 2011). Indeed, the beetle could be associated with  
326 these bacteria and yeast to benefit from the detoxification of the environment. With this  
327 assemblage of microorganisms carried on its cuticle, the insect could face the tree defense  
328 system and successfully colonize the phloem. In return, microorganisms get access to a new  
329 niche.

330         Apart from the plant protection mechanisms, insects are also confronted to  
331 antagonistic microorganisms under the bark, such as fungi. *Pseudomonas* and *Serratia*  
332 genera have been reported to express antifungal activities against antagonistic fungi and are  
333 believed to play a major role in the beetle defense against pathogenic microorganisms  
334 under the bark (Cardoza *et al.*, 2006; Winder *et al.*, 2010). Moreover, yeasts and filamentous

335 fungi associated with *Dendroctonus* species are also able to produce volatile compounds  
336 that modulate the growth of other fungi under the bark (Adams *et al.*, 2008; Cale *et al.*,  
337 2016). *Ogataea pini*, associated with a few *Dendroctonus* species, produce volatile  
338 compounds that inhibit the growth of the entomopathogenic fungus *Beauveria bassiana*  
339 (Davis & Hofstetter, 2011). Accordingly, the *Ogataea* genus was identified in abundance in  
340 the ectomicrobiota of the adults. Based on the published functions and the presence of  
341 many microorganisms associated with the ectomicrobiota of the adults, we hypothesize  
342 that *D. simplex* is carrying on his exoskeleton a microbial assemblage implicated in the  
343 defense mechanisms of the insects, protecting them during the colonization.

344         Numerous studies report the implication of microorganisms in beetle nutrition,  
345 completing the nutrient-poor phloem diet (Paine *et al.*, 1997; Adams & Six, 2007; Six &  
346 Wingfield, 2011; Popa *et al.*, 2012; Davis, 2014). As beetle pioneers colonize a new  
347 environment, they should bring along these microorganisms on their exoskeleton to  
348 colonize the galleries they are digging. They can then proliferate under the bark, enabling  
349 the next generation of insects to feed on them. Such microbial gardening has been observed  
350 in ants, termites, and ambrosia beetle (Mueller & Gerardo, 2002; Mueller *et al.*, 2005).  
351 Many authors hypothesize that filamentous fungi could be a nutritional source for beetles,  
352 mainly by providing nitrogen and sterols, essential for oogenesis and larval development  
353 (Klepzig & Six, 2004; Bentz & Six, 2006; Adams & Six, 2007). Moreover, *Candida* species  
354 isolated from Coleoptera degrade many compounds, such as sugar and cellulose, and  
355 produce vitamins (Chararas *et al.*, 1983). More recently, the implication of associated yeasts  
356 in beetle nutrition has been hypothesized (Davis, 2014; Durand *et al.*, 2017). Accordingly,  
357 yeasts such as *Candida* were found in abundance in feeding developmental stages (adults  
358 and larvae) while being underrepresented in the inactive stage (pupae). This finding



359 supports the implication of yeasts in beetle nutrition. Bacteria are also essential for the  
360 beetle diet, acting mainly as nitrogen fixators and cellulose degraders (Popa *et al.*, 2012).  
361 *Rahnella aquatilis*, associated with many *Dendroctonus* species, can fix nitrogen, leading  
362 authors to hypothesize that this bacterium could concentrate nitrogen to fulfil insect needs  
363 (Morales-Jimenez *et al.*, 2009; Morales-Jimenez *et al.*, 2012). Additionally, many  
364 *Pseudomonas* species, such as *Pseudomonas fluorescens*, also isolated from *Dendroctonus*  
365 species, have cellulolytic activity (Morales-Jimenez *et al.*, 2012; Hu *et al.*, 2014; Briones-  
366 Roblero *et al.*, 2017). Bacteria belonging to this genus could be implicated in cellulose  
367 breakdown, helping the insect to assimilate recalcitrant carbon sources. Vitamins and amino  
368 acids are also thought to be supplemented by bacteria, but no direct evidence is yet  
369 available (Gibson & Hunter, 2010). We hypothesize that filamentous fungi, yeasts, and  
370 bacteria providing nutritional benefits are transported by pioneer adults of *D. simplex*, and  
371 are inoculated in the galleries during their construction, so the next generation can feed on  
372 them to complete their development, explaining their predominant presence in the  
373 ectomicrobiota of adults. As demonstrated before, the beetle's ectomicrobiota enclosed  
374 specific OTUs, distinct from the galleries samples (Durand *et al.*, 2015). As pioneer beetles  
375 attack and colonize new trees, a selection of beneficial microorganisms by the insect could  
376 occur, leading them to a successful attack.

377 Other bacteria were identified in adults' ectomicrobiota, such as *Erwinia*,  
378 *Pseudoxanthomonas*, *Yersinia*, and some unclassified bacteria, but no specific function is yet  
379 attributed to them. Some authors suggested that they could be involved in beetle defense  
380 or nutrition, or even play some role in the pheromone synthesis or the mediation of  
381 interactions among the microbiota (Gibson & Hunter, 2010; Popa *et al.*, 2012; Hofstetter *et*  
382 *al.*, 2015). Additionally, these bacteria could also be associated with the beetle's galleries

383 rather than transported by the insect, and colonize the ectomicrobiota after galleries  
384 construction, as some of them were previously identified in *D. simplex* galleries (Durand *et*  
385 *al.*, 2015).

386         After reproduction and hatching of eggs, larvae construct their horizontal galleries  
387 and feed on phloem throughout their development (Langor & Raske, 1987b). Accordingly,  
388 microorganisms identified in high proportion in the larval stage should shift and be related  
389 to nutritional benefits, both for the ectomicrobiota, as they colonize the galleries, and the  
390 endomicrobiota, as they feed on them. Indeed, yeasts were predominant in both microbiota.  
391 Furthermore, the same yeast genera were also found in the adults and larvae, with different  
392 abundance for the endomicrobiota, likely reflecting different nutritional requirements for  
393 these two developmental stages. Moreover, bacteria related to nutrition identified in adults  
394 were also present in the ecto- and endomicrobiota of larvae, supporting the hypothesis of  
395 their nutritional benefits. Indeed, results for larvae microbiota support the hypothesis that  
396 pioneers transport microorganisms on their exoskeleton to enable them to grow in the  
397 galleries and the next generation to feed on them. The Shannon diversity index is also lower  
398 in the larvae endomicrobiota compared to other developmental stages. This finding  
399 suggests that a fewer number of bacterial species is required for the larval nutrition when  
400 the insect evolves under the bark, as they live a simpler life once the attack and colonisation  
401 of the tree is achieved.

402         In preparation for the transition to the pupal stage, a larvae excavates a pupal  
403 chamber, stops feeding, empty his gut and blocks the entrance hole with frass (Langor &  
404 Raske, 1987b). Accordingly, filamentous fungi were predominantly associated with this  
405 stage, for both the ecto- and endomicrobiota, whereas yeasts were underrepresented. This  
406 further supports a model where yeasts play a fundamental role in nutrition. The pupa is

407 inactive under the bark, and so this developmental stage is more vulnerable. Pupal  
408 chambers harbor spores of filamentous fungi, and it was hypothesized that beetles could  
409 acquire them at this stage (Six, 2003). Associated filamentous fungi produce antifungal  
410 compounds that inhibit the growth of antagonistic fungi, protecting the beetle under the  
411 bark (Paine *et al.*, 1997; Cale *et al.*, 2016). Pupae may form an association with these  
412 filamentous fungi for their protection during this crucial period of development, explaining  
413 the presence of more genera of filamentous fungi associated with this developmental stage.  
414 The change from active to passive behaviour could then explain the significant modification  
415 in fungal community structure of *D. simplex* pupae. Additionally, the bacterial population  
416 exhibits a similar shift in its abundant microorganisms, as bacteria involved in nutritional  
417 functions were underrepresented. Unclassified Enterobacteriaceae and  
418 Gammaproteobacteria were mainly associated with pupae. Unfortunately, no particular  
419 function has been attributed to these bacteria yet. Our results suggest that there are  
420 probably endosymbiotic bacteria as they are found in pupae after the beetle empties its gut,  
421 and also in pioneer beetles. Additionally, these unclassified groups were recovered from the  
422 endomicrobiota of *D. simplex* in our previous study on hybrid larches (Durand *et al.*, 2015).  
423 These OTUs appear to represent novel species, as they do not correspond to known bacteria  
424 in public databases.

425         After the pupal stage, the insect transforms into adult and hibernates in the pupal  
426 chamber for winter. Before the flight period in the spring, the new generation of insects  
427 needs to feed to reach its sexual maturity (Langor & Raske, 1987b). Apart from the phloem,  
428 insects may feed on filamentous fungi found in their pupal chamber, as they were reported  
429 to contain a high concentration of sterols, but mainly on yeasts as they are found in  
430 abundance in the adult's endomicrobiota and in the galleries (Bentz & Six, 2006; Adams &

431 Six, 2007; Durand *et al.*, 2017). Accordingly, mainly the unclassified Enterobacteriaceae and  
432 Gammaproteobacteria were identified in these samples, and the bacteria related to  
433 nutrition were underrepresented, also supporting the hypothesis of a feeding function for  
434 the yeasts. The next generation will then emerge from the bark and attack a new tree.

435         When considering the whole developmental process and the microorganisms  
436 altogether, we can hypothesize that bark beetle pioneers carry the microbial assemblage  
437 needed for a successful attack and the complete development cycle occurring under the  
438 bark. Indeed, all microorganisms with possible functions were identified in the adult  
439 samples. According to the beetle's requirements, the abundance of microorganisms shifts  
440 between the developmental stages, as their functions differ. Some of these microorganisms  
441 could be acquired by the new generation by vertical transfer or could be acquired by  
442 horizontal transfer as they colonize the galleries.

443         Investigating the structure of the microbial community (bacteria, filamentous fungi,  
444 and yeasts) associated with the eastern larch beetle revealed significant changes in their  
445 relative abundance over the various stages. Changes in bacterial and fungal community  
446 structures seem to be triggered by the physiological origin (ecto and endo) and by the  
447 developmental stages of the insect. These variations can be explained by the succession of  
448 functions required by each developmental stage, and beetle requirements. These results  
449 suggest that a symbiotic association between the eastern larch beetle and some of these  
450 microorganisms take place and that this *D. simplex* symbiotic complex is helping the insect  
451 to colonize its host tree and survive under subcortical conditions.

452

453

454

## 455 **Funding**

456           This work was supported by the Direction Générale de la Production des Semences  
457 et de Plants Forestiers (DGPSP) [grant number DGPSP-2013-1122435] to CG. AAD was  
458 supported by INRS-Institut Armand-Frappier Academic Funds and the Wladimir A. Smirnoff  
459 Fellowship.

460

461

## 462 **Acknowledgments**

463           We would like to thank Amélie Bergeron for her help with samples preparation and  
464 DNA extraction. We would also like to thank Fabrice Jean-Pierre, Jean-Philippe Buffet and  
465 Marie-Christine Groleau for their technical assistance.

466

467

## 468 **References**

- 469 Adams AS, Aylward FO, Adams SM, Erbilgin N, Aukema BH, Currie CR, Suen G & Raffa KF  
470 (2013) Mountain pine beetles colonizing historical and naïve host trees are  
471 associated with a bacterial community highly enriched in genes contributing to  
472 terpene metabolism. *Appl. Environ. Microbiol.* 79: 3468-3475.
- 473 Adams AS, Boone CK, Bohlmann J & Raffa KF (2011) Responses of bark beetle-  
474 associated bacteria to host monoterpenes and their relationship to insect life  
475 histories. *J. Chem. Ecol.* 37: 808-817.
- 476 Adams AS & Six DL (2007) Temporal variation in mycophagy and prevalence of fungi  
477 associated with developmental stages of *Dendroctonus ponderosae* (Coleoptera:  
478 Curculionidae). *Environ. Entomol.* 36: 64-72.
- 479 Adams AS, Six DL, Adams SM & Holben WE (2008) In vitro interactions between yeasts  
480 and bacteria and the fungal symbionts of the mountain pine beetle  
481 (*Dendroctonus ponderosae*). *Microb. Ecol.* 56: 460-466.
- 482 Bentz BJ & Six DL (2006) Ergosterol content of fungi associated with *Dendroctonus*  
483 *ponderosae* and *Dendroctonus rufipennis* (Coleoptera: Curculionidae, Scolytinae).  
484 *Ann. Entomol. Soc. Am.* 99: 189-194.
- 485 Boone CK, Keefover-Ring K, Mapes AC, Adams AS, Bohlmann J & Raffa KF (2013)  
486 Bacteria associated with a tree-killing insect reduce concentrations of plant  
487 defense compounds. *J. Chem. Ecol.* 39: 1003-1006.
- 488 Bridges JR (1981) Nitrogen-fixing bacteria associated with bark beetles. *Microb. Ecol.* 7:  
489 131-137.
- 490 Briones-Roblero CI, R. R-D, Santiago-Cruz JA, Zuniga G & Rivera-Orduna FN (2017)  
491 Degradation capacities of bacteria and yeasts isolated from the gut of

- 492 Dendroctonus rhizophagus (Curculionidae: Scolytinae). *Folia Microbiol. (Praha)*  
493 62: 1-9.
- 494 Cale JA, M. CR, Klutsch JG, Kanekar SS, Hussain A & Erbilgin N (2016) Fungal Volatiles  
495 Can Act as Carbon Sources and Semiochemicals to Mediate Interspecific  
496 Interactions Among Bark Beetle-Associated Fungal Symbionts. *PLoS ONE* 11:  
497 e0162197.
- 498 Cardoza YJ, Klepzig KD & Raffa KF (2006) Bacteria in oral secretions of an endophytic  
499 insect inhibit antagonistic fungi. *Ecol. Entomol.* 31: 636-645.
- 500 Chararas C, Pignal M-C, Vodjdani G & Bourgeay-Causse M (1983) Glycosidases and B  
501 group vitamins produced by six yeasts strains from digestive tract of  
502 *Phoracantha semipunctata* larvae and their role in the insect development.  
503 *Mycopathologia* 83: 9-15.
- 504 Comeau AM, Harding T, Galand PE, Vincent WF & Lovejoy C (2012) Vertical distribution  
505 of microbial communities in a perennially stratified Arctic lake with saline,  
506 anoxic bottom waters. *Sci Rep* 2: 1-10.
- 507 Davis TS (2014) The Ecology of Yeasts in the Bark Beetle Holobiont: A Century of  
508 Research Revisited. *Microb. Ecol.* 69: 723-732.
- 509 Davis TS & Hofstetter RW (2011) Reciprocal interactions between the bark beetle-  
510 associated yeast *Ogataea pini* and host plant phytochemistry. *Mycologia* 103:  
511 1201-1207.
- 512 Davis TS, Hofstetter RW, Foster JT, Foote NE & Keim P (2011) Interactions between the  
513 yeast *Ogataea pini* and filamentous fungi associated with the western pine beetle.  
514 *Microb. Ecol.* 61: 626-634.

- 515 Durand A-A, Bergeron A, Constant P, Buffet J-P, Déziel E & Guertin C (2015) Surveying  
516 the endomicrobiome and ectomicrobiome of bark beetles: The case of  
517 *Dendroctonus simplex*. *Sci Rep* 5: 17190.
- 518 Durand A-A, Buffet J-P, Constant P, Déziel E & Guertin C (2017) Fungal communities  
519 associated with the eastern larch beetle: diversity and variation within  
520 developmental stages. *BioRxiv*, doi: <https://doi.org/10.1101/220780>
- 521 Edgar RC, Haas BJ, Clemente JC, Quince C & Knight R (2011) UCHIME improves  
522 sensitivity and speed of chimera detection. *Bioinformatics* 27: 2194-2200.
- 523 Gibson CM & Hunter MS (2010) Extraordinarily widespread and fantastically complex:  
524 comparative biology of endosymbiotic bacterial and fungal mutualists of insects.  
525 *Ecol. Lett.* 13: 223-234.
- 526 Hofstetter RW, Dinkins-Bookwalter J, Davis TS & Klepzig KD (2015) Symbiotic  
527 associations of bark beetles. *Bark Beetles*, Vega F E & Hofstetter R W (Édit.)  
528 Elsevier, USA.
- 529 Hu X, Yu J, Wang C & Chen H (2014) Cellulolytic Bacteria Associated with the Gut of  
530 *Dendroctonus armandi* Larvae (Coleoptera: Curculionidae: Scolytinae). *Forests* 5:  
531 455-465.
- 532 Klepzig KD & Six DL (2004) Bark beetle-fungal symbiosis: Context dependency in  
533 complex associations. *Symbiosis* 37: 189-205.
- 534 Kwong WK & Moran NA (2013) Cultivation and characterization of the gut symbionts of  
535 honey bees and bumble bees: description of *Snodgrassella alvi* gen. nov., sp. nov.,  
536 a member of the family *Neisseriaceae* of the *Betaproteobacteria*, and *Gilliamella*  
537 *apicola* gen. nov., sp. nov., a member of *Orbaceae* fam. nov., *Orbales* ord. nov., a  
538 sister taxon to the order 'Enterobacteriales' of the *Gammaproteobacteria*. *Int. J.*  
539 *Syst. Evol. Microbiol.* 63: 2008-2018.



- 540 Langor DW & Raske AG (1987a) Emergence, host attack, and overwintering behavior of  
541 the eastern larch beetle, *Dendroctonus simplex* LeConte (Coleoptera: Scolytidae),  
542 in Newfoundland. *The Canadian Entomologist* 119: 975-983.
- 543 Langor DW & Raske AG (1987b) Reproduction and development of the eastern larch  
544 beetle, *Dendroctonus simplex* LeConte (Coleoptera: Scolytidae), in Newfoundland.  
545 *The Canadian Entomologist* 119: 985-992.
- 546 Langor DW & Raske AG (1989a) The eastern larch beetle, another threat to our forests  
547 (Coleoptera: Scolytidae). *Forestry Chronicle* 65: 276-279.
- 548 Langor DW & Raske AG (1989b) A history of the eastern larch beetle, *Dendroctonus*  
549 *simplex* (Coleoptera: Scolytidae), in North America. *The Great Lakes Entomologist*  
550 22: 139-154.
- 551 Lieutier F, Yart A & Salle A (2009) Stimulation of tree defenses by *Ophiostomatoid* fungi  
552 can explain attack success of bark beetles on conifers. *Ann. For. Sci.* 66: 1-22.
- 553 Margulis L & Fester R (1991) *Symbiosis as a source of evolutionary innovation: speciation*  
554 *and morphogenesis*. Mit Press.
- 555 Martin KJ & Rygiewicz PT (2005) Fungal-specific PCR primers developed for analysis of  
556 the ITS region of environmental DNA extracts. *BMC Microbiol.* 5: 1-11.
- 557 Morales-Jimenez J, Vera-Ponce de León A, García-Domínguez A, Martínez-Romero E,  
558 Zuniga G & Hernandez-Rodriguez C (2013) Nitrogen-fixing and uricolytic  
559 bacteria associated with the gut of *Dendroctonus rhizophagus* and *Dendroctonus*  
560 *valens* (Curculionidae: Scolytinae). *Microb. Ecol.* 66: 200-210.
- 561 Morales-Jimenez J, Zuniga G, Ramirez-Saas HC & Hernandez-Rodriguez C (2012) Gut-  
562 associated bacteria throughout the life cycle of the bark beetle *Dendroctonus*  
563 *rhizophagus* Thomas and Bright (Curculionidae: Scolytinae) and their cellulolytic  
564 activities. *Microb. Ecol.* 64.

- 565 Morales-Jimenez J, Zuniga G, Villa-Tanaca L & Hernandez-Rodriguez C (2009) Bacterial  
566 community and nitrogen fixation in the red turpentine beetle, *Dendroctonus*  
567 *valens* LeConte (Coleoptera: Curculionidae: Scolytinae). *Microb. Ecol.* 58: 879-891.
- 568 Mueller UG & Gerardo NM (2002) Fungus-farming insects: Multiple origins and diverse  
569 evolutionary histories. *PNAS* 99: 15247-15249.
- 570 Mueller UG, Gerardo NM, Aanen DK, Six DL & Schultz TR (2005) The evolution of  
571 agriculture in insects. *Annual Review of Ecology, Evolution, and Systematics* 36:  
572 563-595.
- 573 Paine TD, Raffa KF & Harrington TC (1997) Interactions among scolytid bark-beetles,  
574 their associated fungi, and live host conifers. *Annu. Rev. Entomol.*:179-206.
- 575 Popa V, Déziel E, Lavallée R, Bauce E & Guertin C (2012) The complex symbiotic  
576 relationships of bark beetles with microorganisms: A potential practical  
577 approach for biological control in forestry. *Pest Manag. Sci.* 68: 963-975.
- 578 Quast C, Pruesse E, Yilmaz P, Gerken J, Schweer T, Yarza P, Peplies J & Glöckner FO  
579 (2013) The SILVA ribosomal RNA gene database project: improved data  
580 processing and web-based tools. *Nucleic Acids Res.* 41: D590-D596.
- 581 Schloss PD, Westcott SL, Ryabin T, Hall JR, Hartmann M, Hollister EB, Lesniewski RA,  
582 Oakley BB, Parks DH, Robinson CJ, Sahl JW, Stres B, Thallinger GG, Van Horn DJ &  
583 Weber CF (2009) Introducing mothur: open-source, platform-independent,  
584 community-supported software for describing and comparing microbial  
585 communities. *Applied and Environmental Microbiology* 75: 7537-7541.
- 586 Schmitt S, Tsai P, Bell J, Fromont J, Ilan M, Lindquist N, Perez T, Rodrido A, Schupp PJ,  
587 Vacelet J, Webster NS, Hentschel U & Taylor MW (2012) Assessing the complex  
588 sponge microbiota: core, variable and species-specific bacterial communities in  
589 marine sponges. *The ISME Journal* 6: 564-576.

- 590 Scott JJ, Oh DC, Yuceer MC, Klepzig KD, Clardy J & Currie CR (2008) Bacterial protection  
591 of beetle-fungus mutualism. *Science* 322: 63.
- 592 Six DL (2003) Bark Beetle Fungus Symbioses. *Insect Symbiosis*, Bourtzis K & Miller T A  
593 (Édit.) CRC Press LLC, Vol 1. p 97-114.
- 594 Six DL (2013) The bark beetle holobiont: Why microbes matter. *J. Chem. Ecol.* 39: 989-  
595 1002.
- 596 Six DL & Wingfield MJ (2011) The role of phytopathogenicity in bark beetle–fungus  
597 symbioses: a challenge to the Classic Paradigm. *Annu. Rev. Entomol.*:255-272.
- 598 Wang Q, Garrity GM, Tiedje J & Cole JR (2007) Naïve bayesian classifier for rapid  
599 assignment of rRNA sequences into the new bacterial taxonomy. *Appl. Environ.*  
600 *Microbiol.* 73: 5261-5267.
- 601 Winder RS, Macey DE & Cortese J (2010) Dominant bacteria associated with broods of  
602 mountain pine beetle, *Dendroctonus ponderosae* (Coleoptera: Curculionidae,  
603 Scolytinae). *J. Entomol. Soc. B. C.* 107: 43-56.
- 604 Wood SL (2007) *Bark and ambroza beetles of South America (Coleoptera: Scolytidae)*.  
605 Brigham Young University, Provo, Utah USA. 900 p.
- 606
- 607
- 608

609 **Figures**

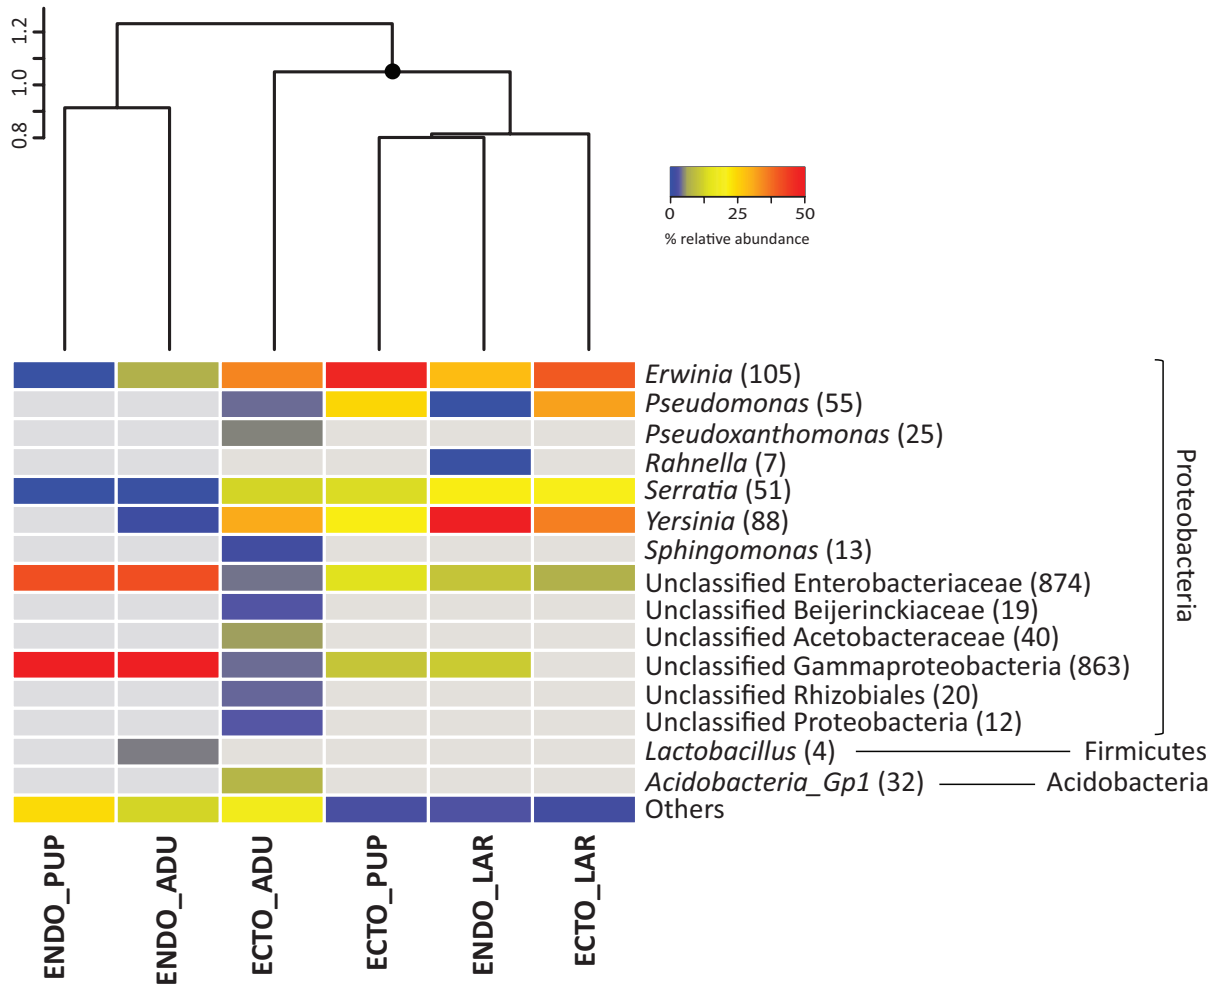

610

611 **Figure 1. Bacterial community associated with different *D. simplex* developmental stages.**

612 Based on equalized dataset. The mean relative abundance of the three replicates is

613 presented. Abundant OTUs ( $\geq 1\%$  of relative abundance in one sample) are presented, non-

614 abundant OTUs ( $< 1\%$ ) are grouped in the category others. The grey color represents the

615 absence of OTUs in the samples. The number in parenthesis represents the abundance of

616 OTUs. Similarity cluster (UPGMA) grouping the different samples is presented above the

617 heatmap, with significant ( $\geq 95\%$ ) node mark as black circles. ECTO = ectomicrobiota, ENDO

618 = endomicrobiota, ADU = adults, LAR = Larvae, PUP = Pupae.

619

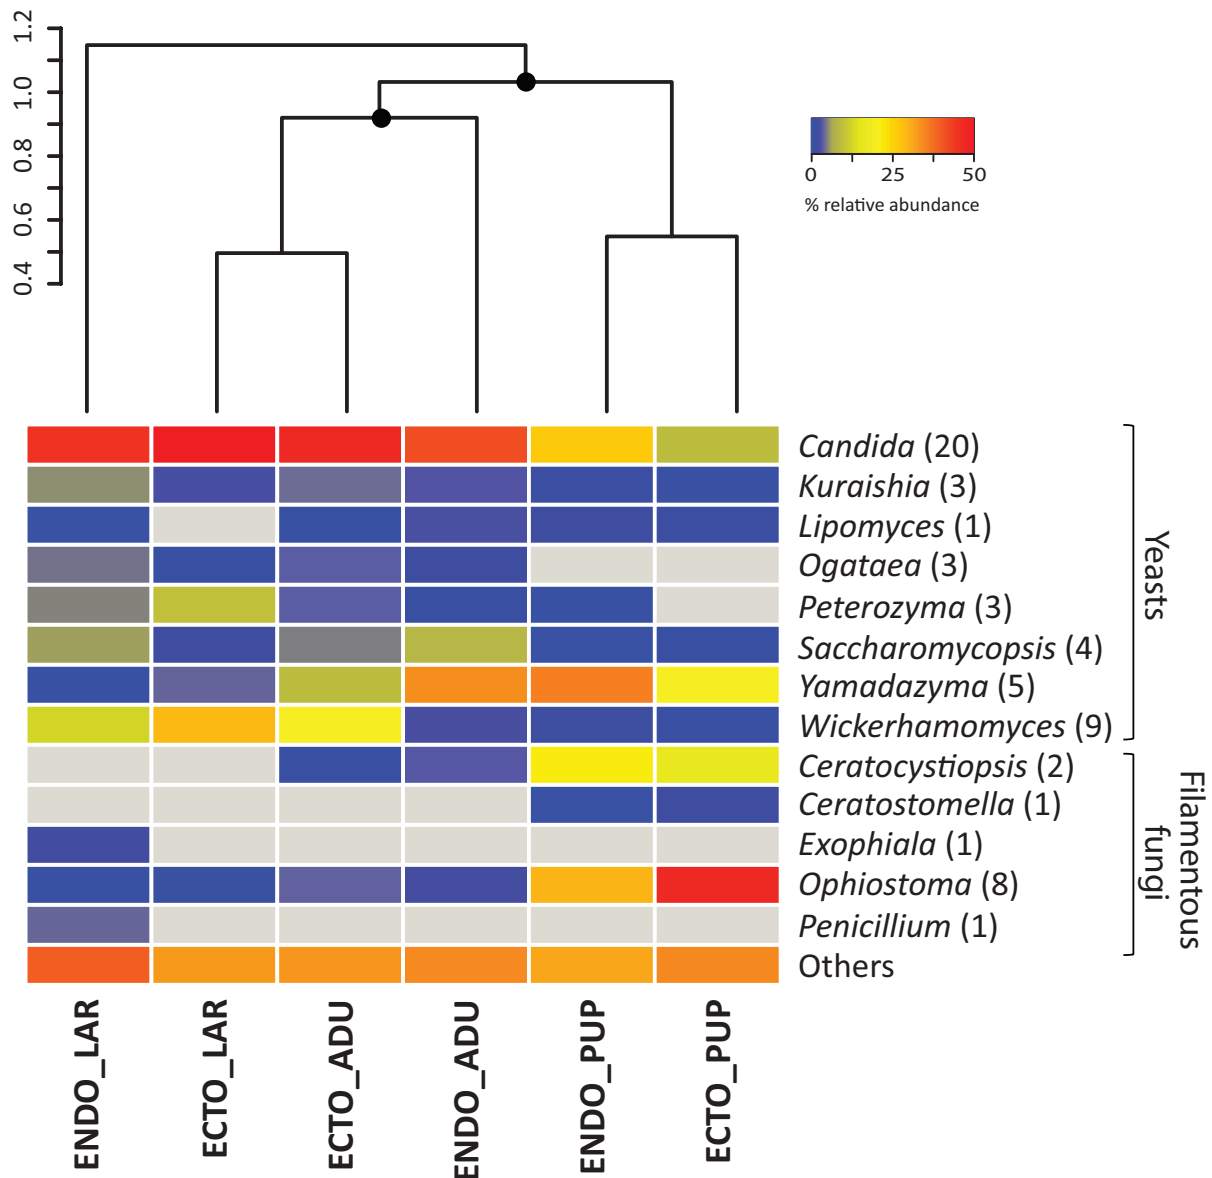

620

621 **Figure 2. Fungal community related to different *D. simplex* developmental stages.** Based

622 on equalized dataset. The mean relative abundance of the three replicates is presented.

623 Abundant OTUs are presented, non-abundant OTUs are grouped in the category others. The

624 grey color represents the absence of OTUs in the samples. The number in parenthesis

625 represents the abundance of OTUs. Similarity cluster (UPGMA) grouping the different

626 samples is presented above the heatmap, with significant ( $\geq 95\%$ ) node mark as black circles.

627 ECTO = ectomicrobiota, ENDO = endomicrobiota, ADU = adults, LAR = Larvae, PUP = Pupae.

628

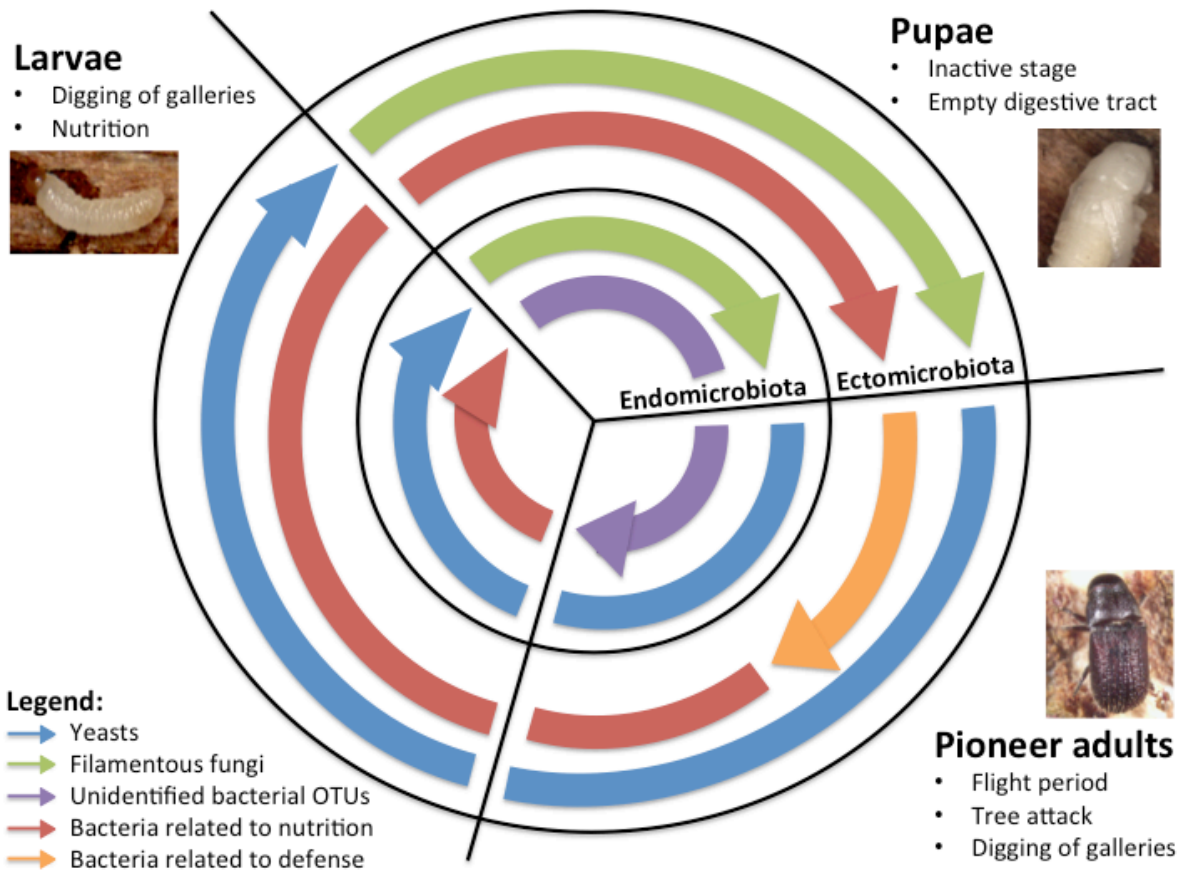

629

630 **Figure 3. Overview of the proposed successional microbiota associated with *D. simplex***

631 **developmental stages and microflora, based on obtained results and literature. The**

632 **predominant microorganisms for each developmental stage and microbiota are presented**

633 **in the figure.**

634

635 **Table**

636 **Table 1. Shannon index for bacterial and fungal microbiota throughout *D. simplex***

637 **development.** The Shannon index was calculated on OTUs obtained from equalized dataset.

638 The mean of three replicates is presented in the table, with the standard error in

639 parenthesis. ANOVA test was performed to identify significant differences between samples.

640 ECTO = ectomicrobiota, ENDO = endomicrobiota, ADU = adults, LAR = Larvae, PUP = Pupae.

641

|                 | <b>Bacteria</b>           |                | <b>Fungi</b>             |                |
|-----------------|---------------------------|----------------|--------------------------|----------------|
|                 | <b>Shannon (se)</b>       | <b>p value</b> | <b>Shannon (se)</b>      | <b>p value</b> |
| <b>ECTO_ADU</b> | 4.69 (0.34) <sup>ab</sup> | 0.0007         | 3.89 (0.25) <sup>a</sup> | 0.34           |
| <b>ECO_LAR</b>  | 4.23 (0.34) <sup>a</sup>  |                | 3.75 (0.25) <sup>a</sup> |                |
| <b>ECTO_PUP</b> | 4.16 (0.34) <sup>a</sup>  |                | 3.59 (0.25) <sup>a</sup> |                |
| <b>ENDO_ADU</b> | 5.87 (0.34) <sup>bc</sup> |                | 3.14 (0.25) <sup>a</sup> |                |
| <b>ENDO_LAR</b> | 3.90 (0.34) <sup>a</sup>  |                | 3.78 (0.25) <sup>a</sup> |                |
| <b>ENDO_PUP</b> | 6.45 (0.34) <sup>c</sup>  |                | 3.40 (0.25) <sup>a</sup> |                |

642

643
